# Supplementary material for: Zap‐Pano: a Photocaged Prodrug of the KDAC Inhibitor Panobinostat
Source: PubMed Central journal article supplement (PMC9291796; doi:10.1002/cmdc.202100403), 2021-07-29
Supplement: CMDC-16-3691-s001.pdf [file CMDC-16-3691-s001.pdf]

# ChemMedChem

Supporting Information

## **Zap-Pano: a Photocaged Prodrug of the KDAC Inhibitor Panobinostat**

Kathrin S. Troelsen, Ewen D. D. Calder<sup>†</sup>, Anna Skwarska<sup>†</sup>, Deborah Sneddon,  
Ester M. Hammond,\* and Stuart J. Conway\*

## Table of contents

|                                                              |     |
|--------------------------------------------------------------|-----|
| NMR spectra of novel and biologically tested compounds       | S2  |
| HPLC traces of novel and biologically tested compounds       | S14 |
| LCMS traces comparing the Pano-NH <sub>2</sub> and Pano acid | S21 |



N-Phthalimido-O-(4, 5-dimethoxy-2-nitrobenzyl)-hydroxylamine (7)

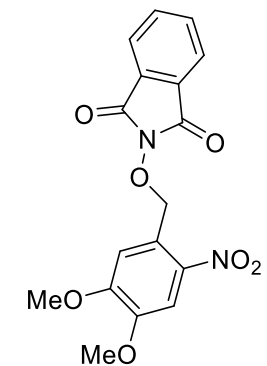

Current Data Parameters  
 NAME E05-07  
 EXPNO 3  
 PROCNO 1

F2 - Acquisition Parameters  
 Date 20190118  
 Time 0.21 h  
 INSTRUM spect  
 PROBE z100s10\_0913 (1  
 PULPROG zgpg30  
 F0 32768  
 SOLVENT CDCl3  
 NS 512  
 DS 4  
 SWH 26041.666 Hz  
 FIDRES 1.589457 Hz  
 AQ 0.6291456 sec  
 RG 197.18  
 JW 19.200 usec  
 DE 6.50 usec  
 TE 298.14 K  
 D1 1.0000000 sec  
 D11 0.0300000 sec  
 TD0 1  
 SFO1 100.6228298 MHz  
 NUC1 13C  
 P1 10.00 usec  
 PLW1 47.86100006 W  
 SFO2 400.1316005 MHz  
 NUC2 1H  
 CPDPRG12 waltz16  
 PCPD2 90.00 usec  
 PLW2 14.36999999 W  
 PLW12 0.34666661 W  
 PLW13 0.17371930 W

F2 - Processing parameters  
 SI 32768  
 SF 100.6127685 MHz  
 XDK EM  
 SSB 0  
 GB 1.00 Hz  
 CB 0  
 PC 1.40

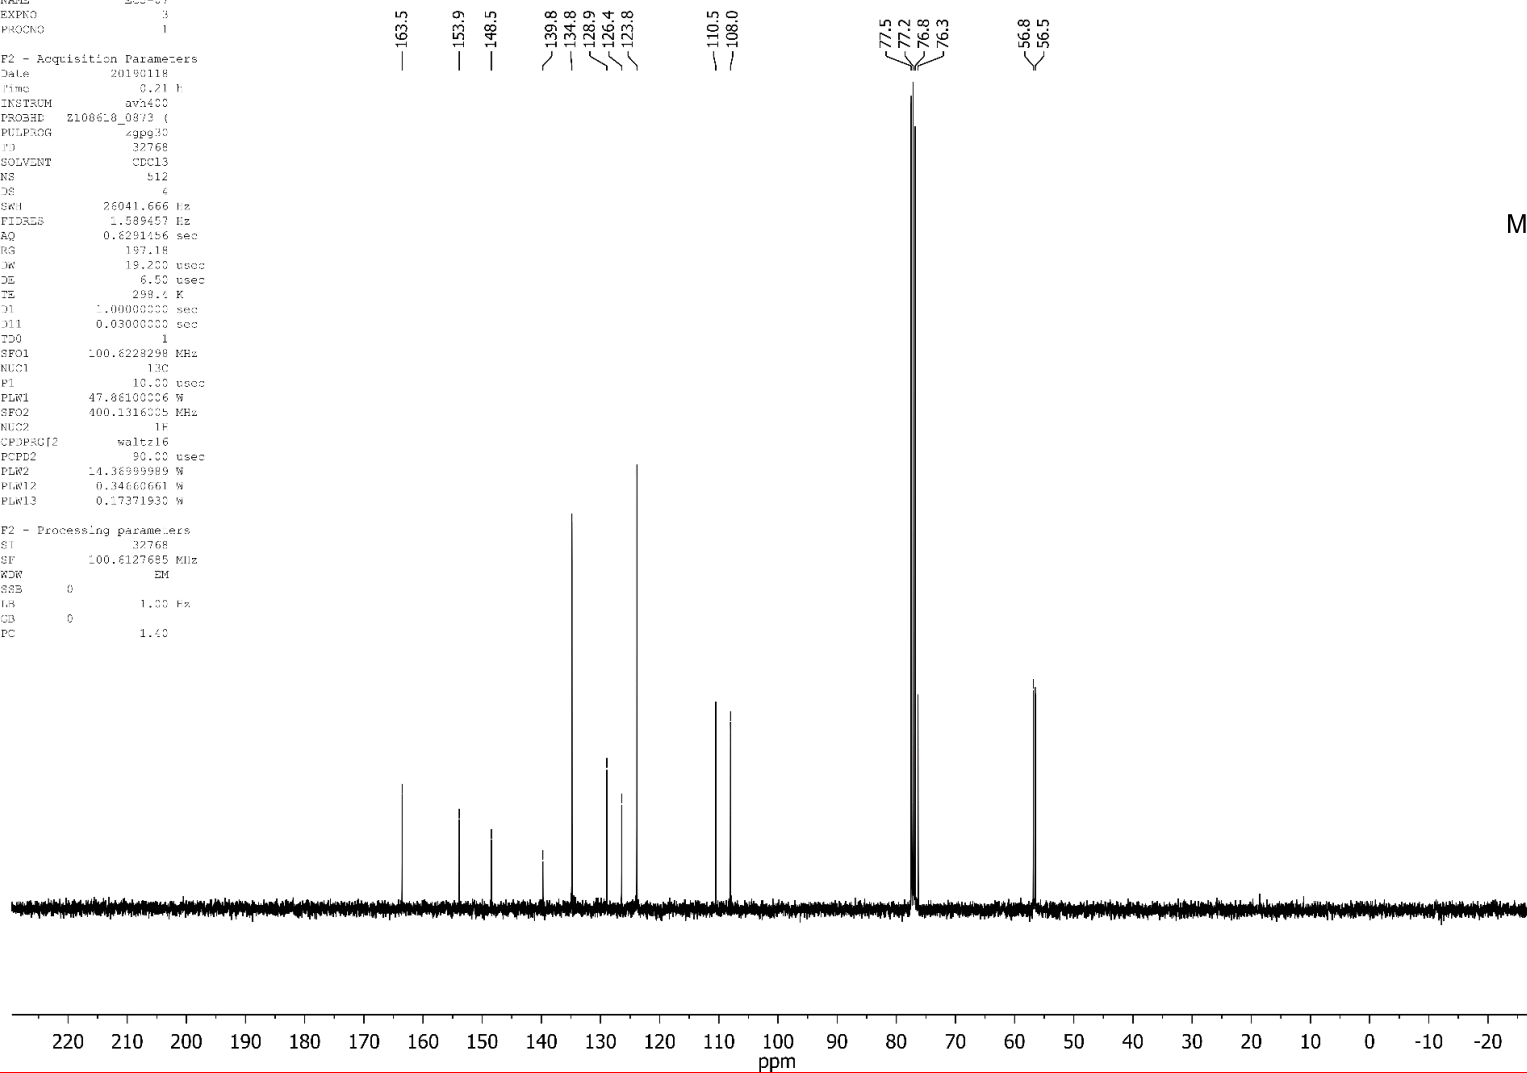

O-(4, 5-Dimethoxy-2-nitrobenzyl)-hydroxylamine (**8**)

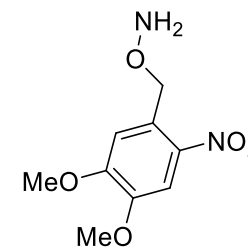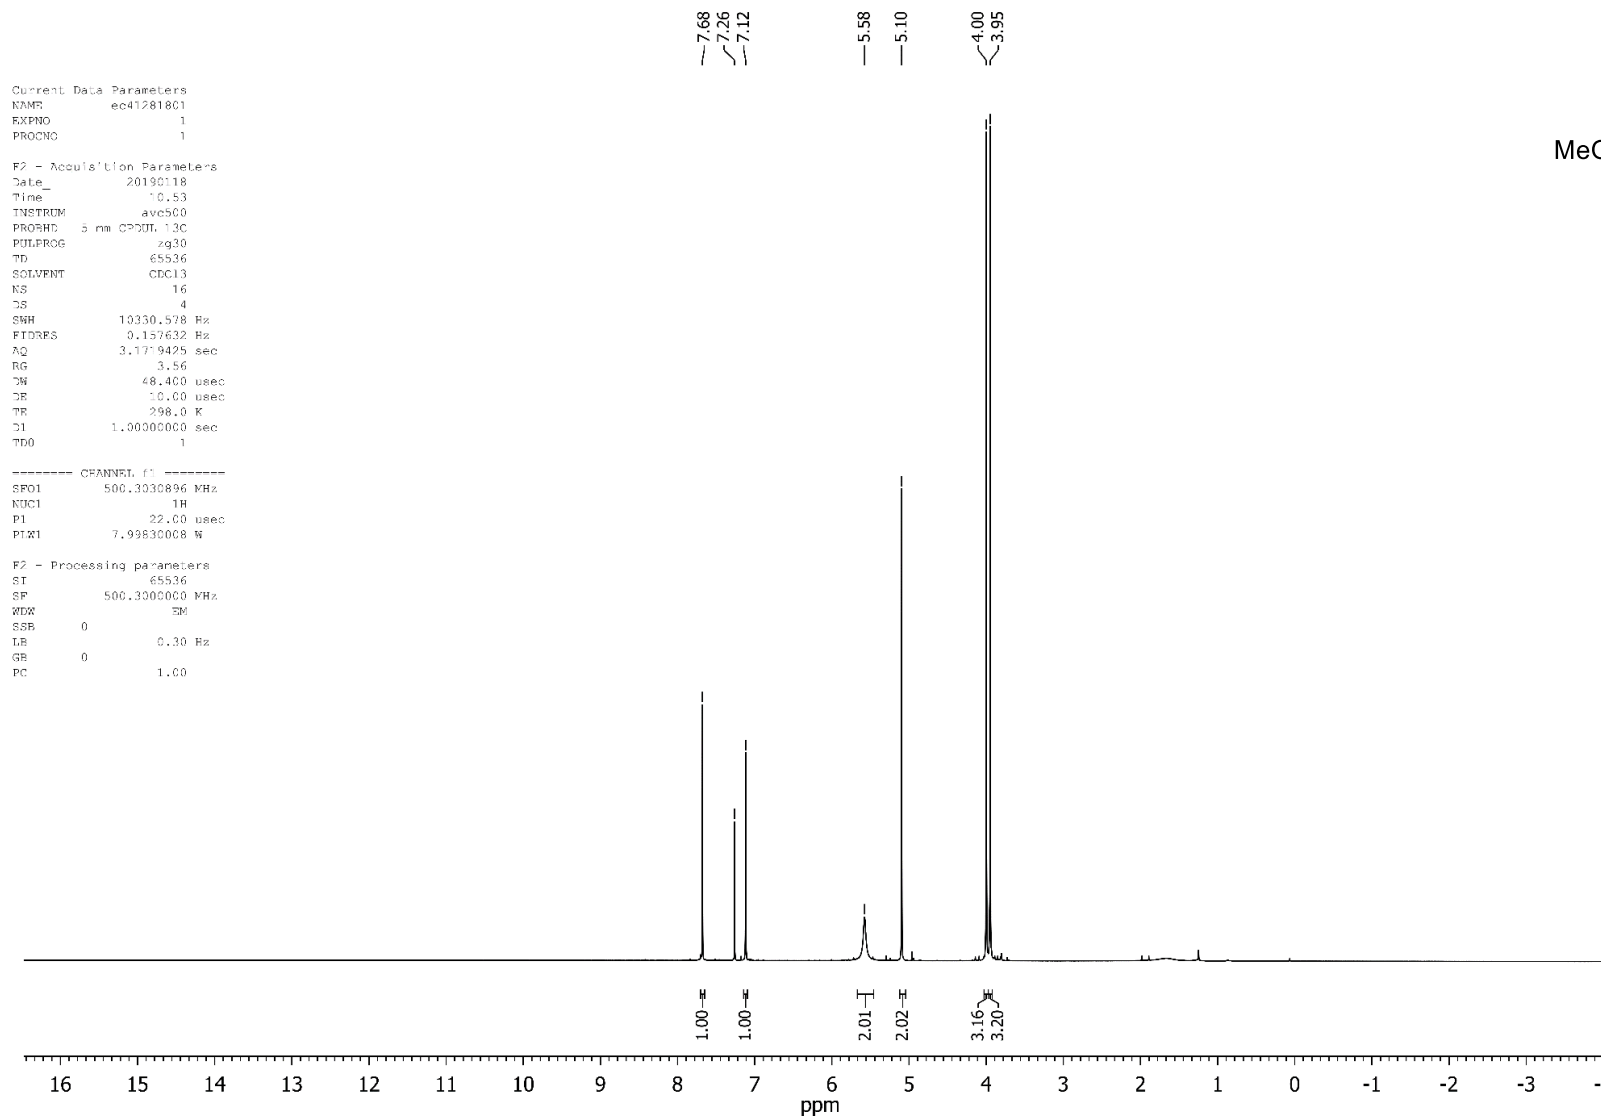

O-(4, 5-Dimethoxy-2-nitrobenzyl)-hydroxylamine (8)

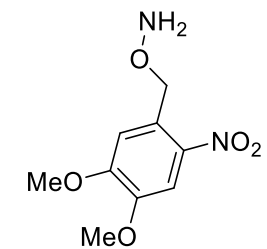

Current Data Parameters  
 NAME ec41281801  
 EXPNO 4  
 PROGNG 1

F2 - Acquisition Parameters  
 Date 20190118  
 Time 13.52  
 INSTRUM spect  
 PROBE 5 mm CPDQZ 13C  
 PULPROG zgpg30  
 PD 65536  
 SOLVENT CDCl3  
 NS 2048  
 DS 2  
 SWH 31250.000 Hz  
 FIDRES 0.476837 Hz  
 AQ 1.0485760 sec  
 RG 912  
 SW 16.000 usec  
 DE 18.00 usec  
 TE 299.0 K  
 D1 2.0000000 sec  
 d11 0.0300000 sec  
 TD0 1

----- CHANNEL f1 -----  
 SFO1 123.8131152 MHz  
 NUC1 13C  
 P1 10.00 usec  
 PLW1 20.18400000 W

----- CHANNEL f2 -----  
 SFO2 500.3020012 MHz  
 NUC2 1H  
 CPDPRG12 waltz16  
 PCPD2 80.00 usec  
 PLW2 7.99830000 W  
 PLW12 0.60487000 W  
 PLW13 0.38712001 W

F2 - Processing parameters  
 SI 32768  
 SF 123.8005351 MHz  
 XDR EM  
 SSB 0  
 LB 1.00 Hz  
 GB 0  
 PC 1.00

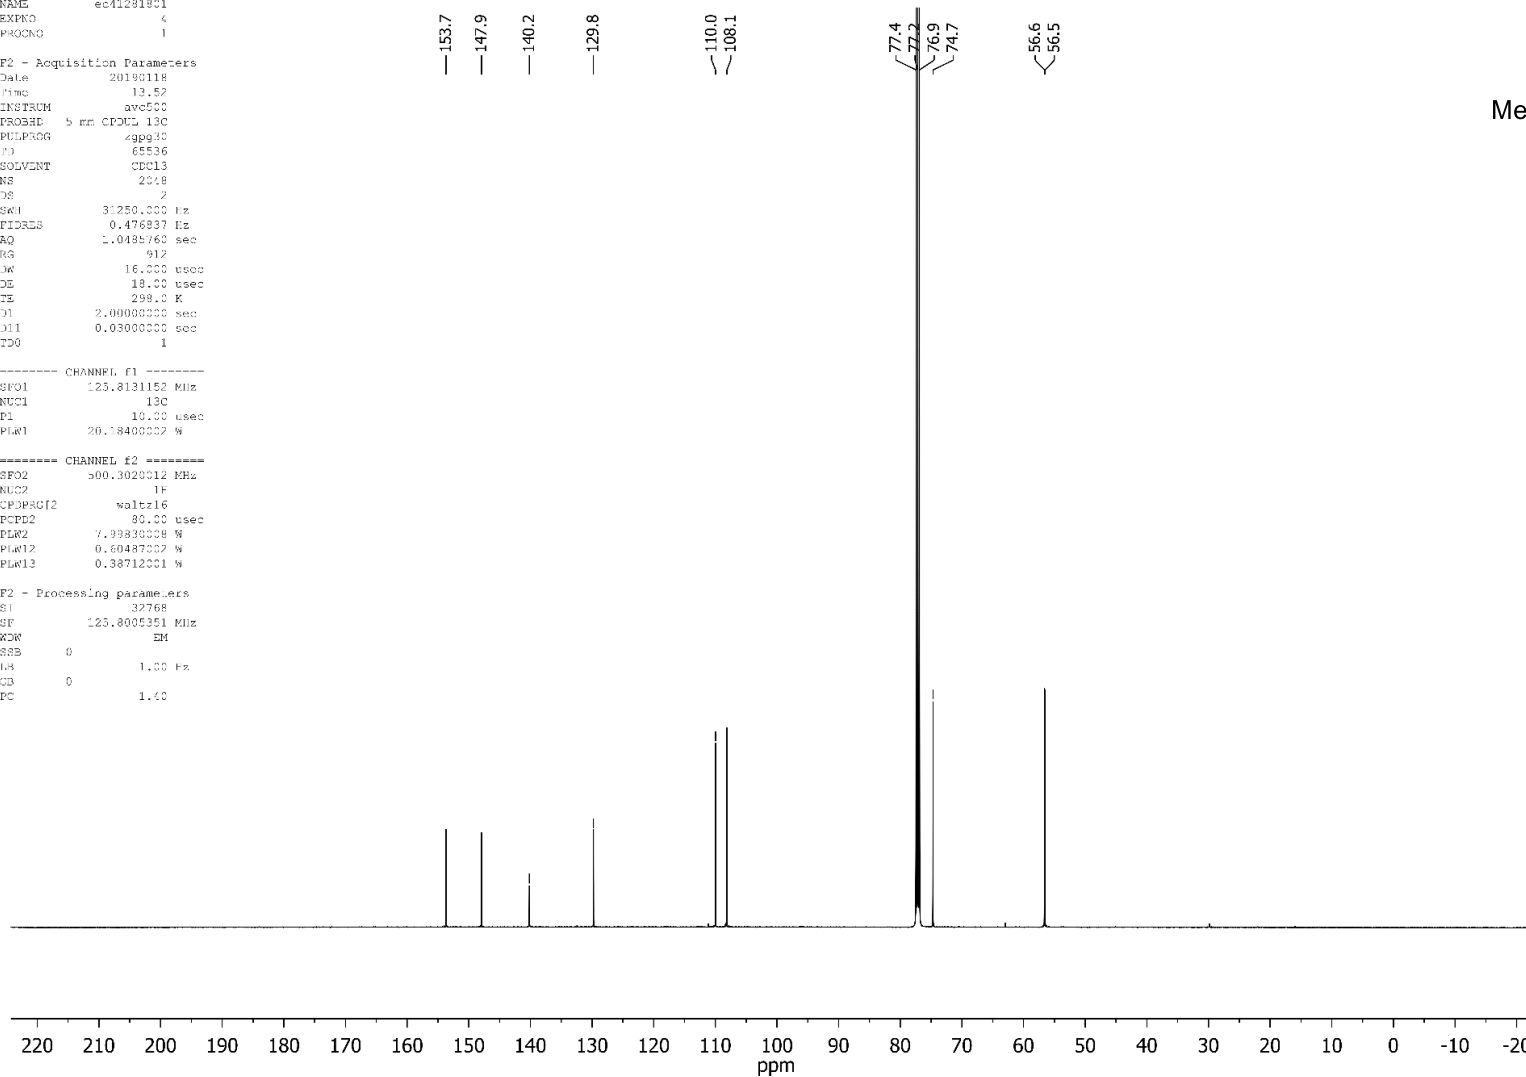

*tert*-Butyl-(*E*)-3-(2-((*tert*-butoxycarbonyl)(4-(3-(((4,5-dimethoxy-2-nitrobenzyl)oxy)amino)-3-oxoprop-1-en-1-yl)benzyl)amino)ethyl)-2-methyl-1*H*-indole-1-carboxylate (**10**)

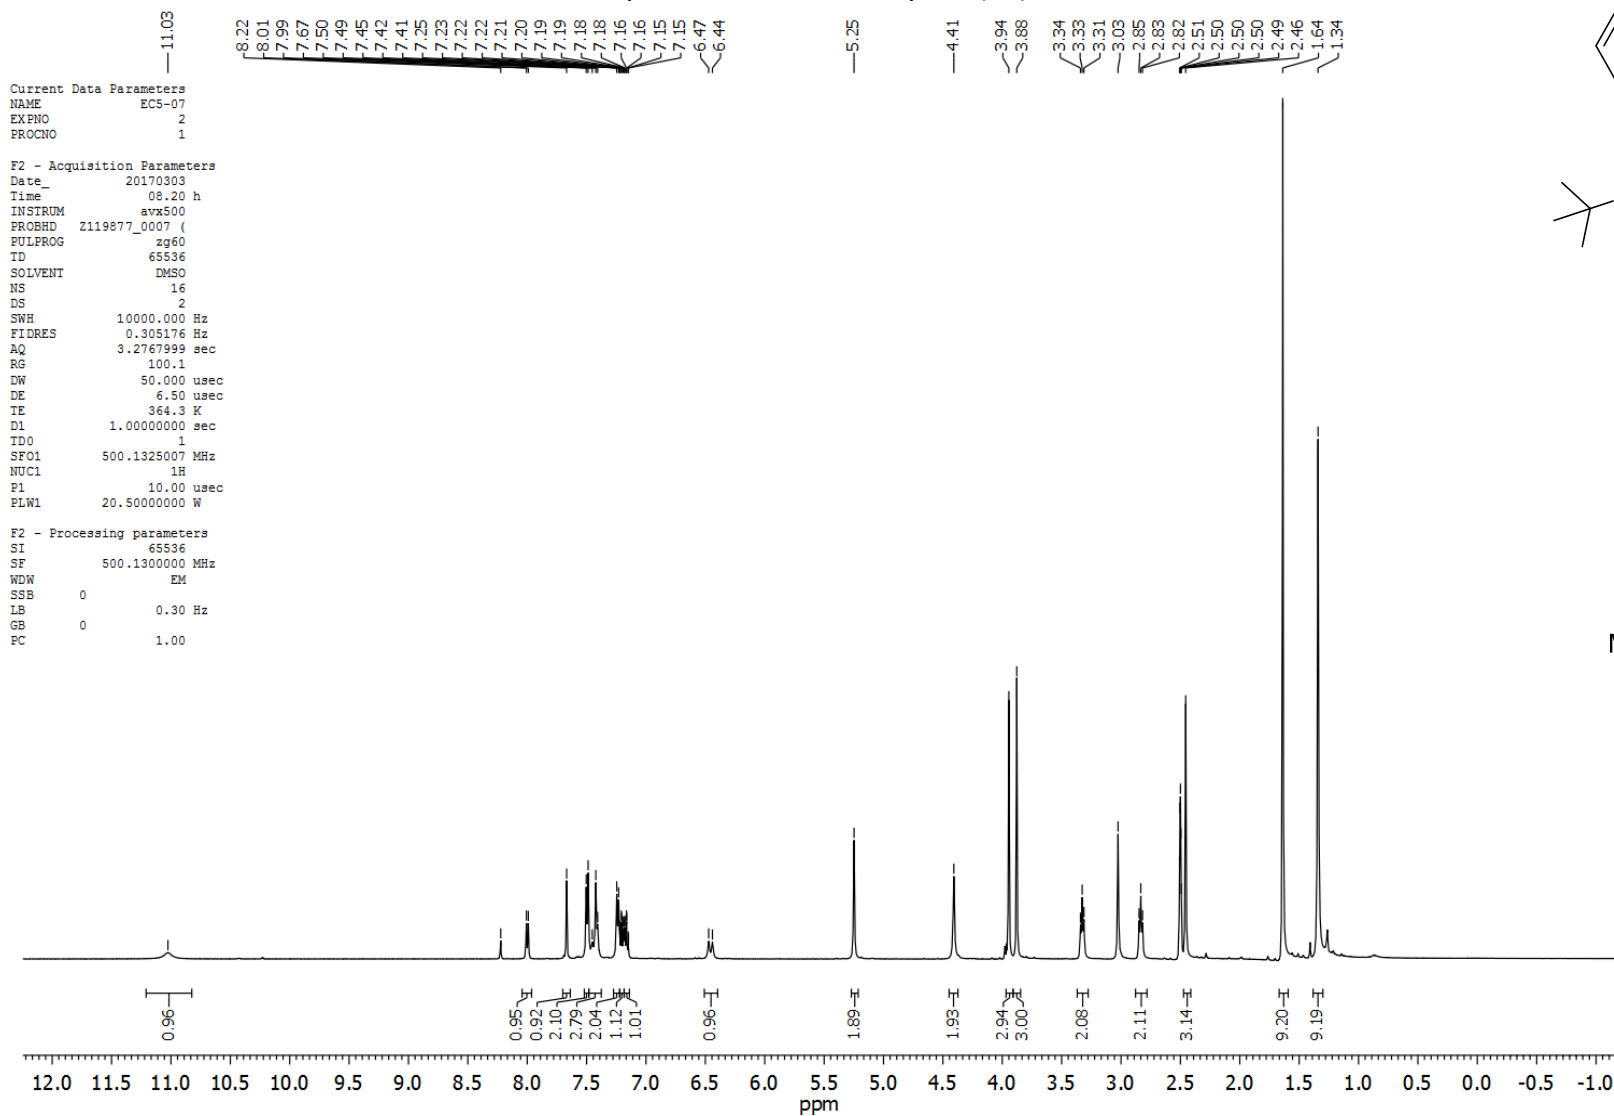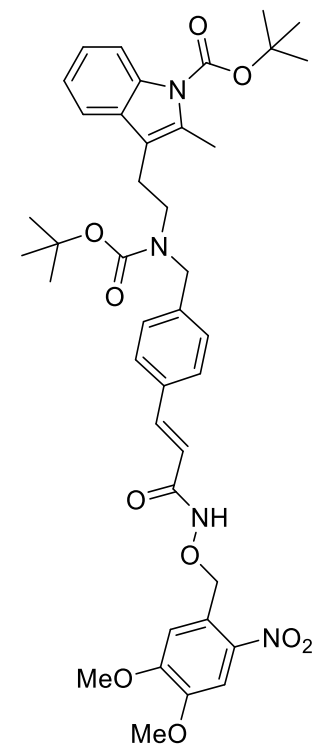

*tert*-Butyl-(*E*)-3-(2-((*tert*-butoxycarbonyl)(4-(3-(((4,5-dimethoxy-2-nitrobenzyl)oxy)amino)-3-oxoprop-1-en-1-yl)benzyl)amino)ethyl)-2-methyl-1*H*-indole-1-carboxylate (**10**)

Current Data Parameters  
 NAME ECS-09 VT  
 EXPNO 4  
 PROCNO 1

F2 - Acquisition Parameters  
 Date\_ 20190122  
 Time 09.47 h  
 INSTRUM avx500  
 PROBHD Z119877\_0007 ( )  
 PULPROG zgpg30  
 TD 65536  
 SOLVENT DMSO  
 NS 2048  
 DS 4  
 SWH 29761.904 Hz  
 FIDRES 0.908261 Hz  
 AQ 1.1010048 sec  
 RG 191.37  
 DW 16.800 usec  
 DE 6.50 usec  
 TE 363.0 K  
 D1 2.0000000 sec  
 D11 0.03000000 sec  
 TD0 1  
 SFO1 125.7703643 MHz  
 NUC1 13C  
 P1 10.00 usec  
 PLW1 76.00000000 W  
 SFO2 500.1320005 MHz  
 NUC2 1H  
 CPDPRG2 waltz16  
 PCPD2 80.00 usec  
 PLW2 20.50000000 W  
 PLW12 0.32031000 W  
 PLW13 0.16111000 W

F2 - Processing parameters  
 SI 32768  
 SF 125.7577885 MHz  
 WDW EM  
 SSB 0  
 LB 1.00 Hz  
 GB 0  
 PC 1.40

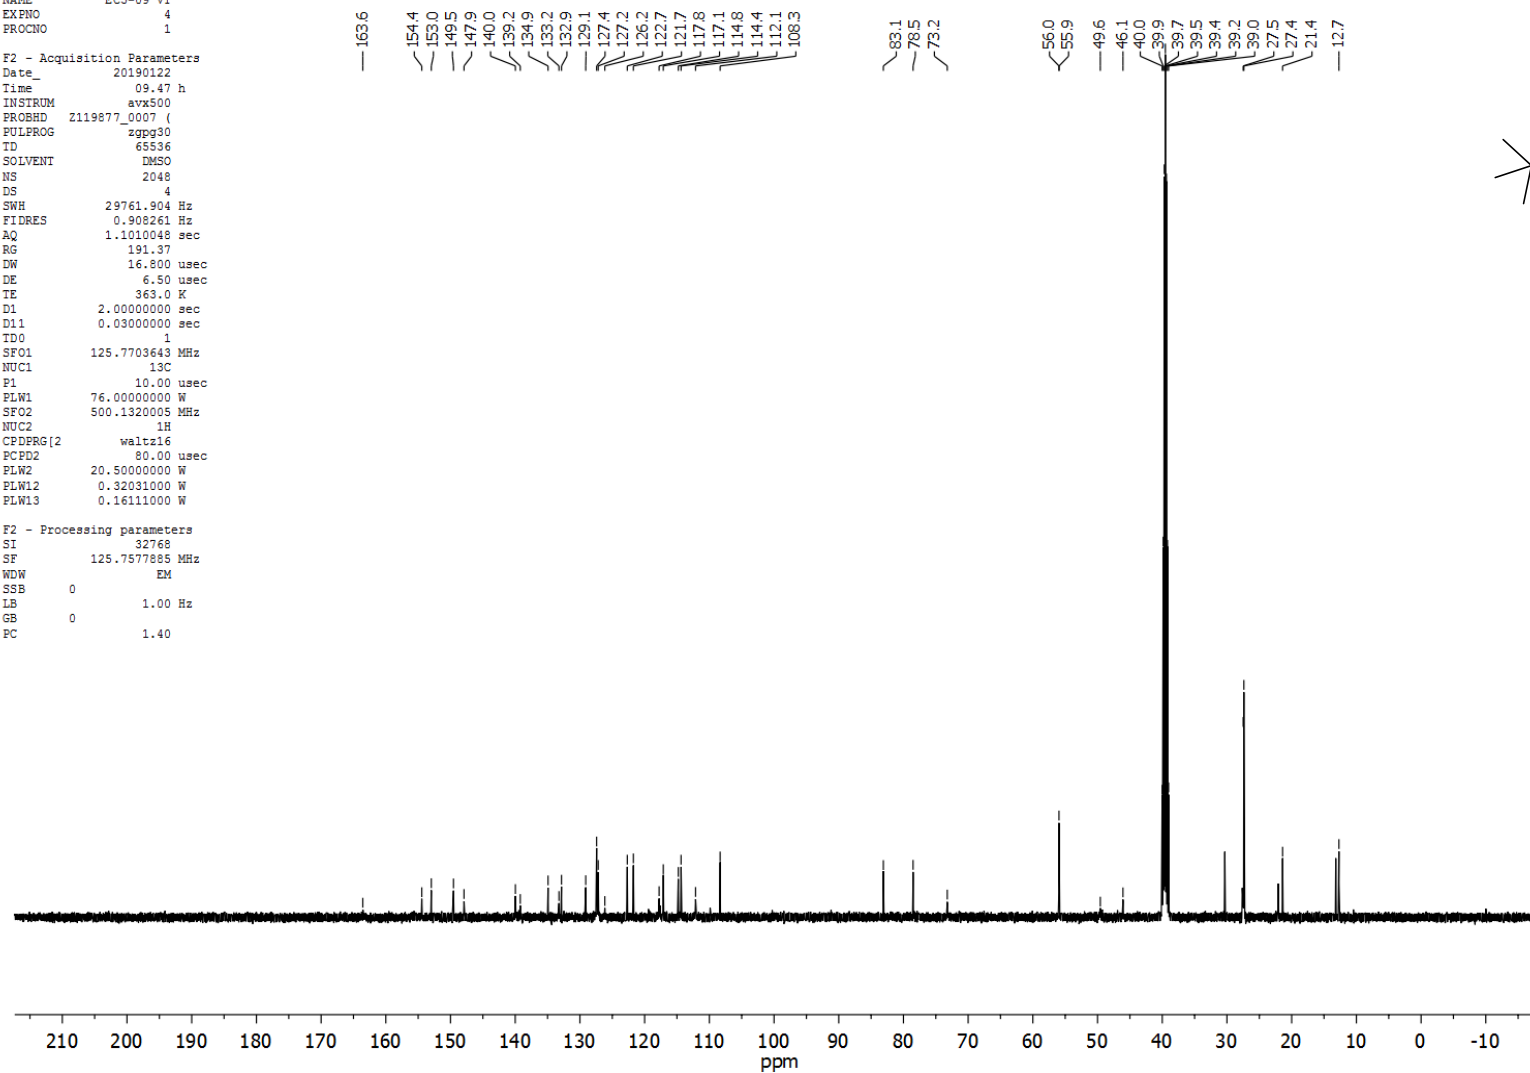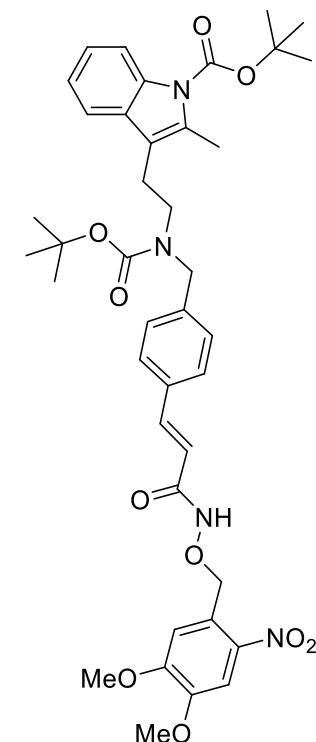



(E)-N-(4-(3-((4,5-Dimethoxy-2-nitrobenzyl)oxy)-3-oxoprop-1-en-1-yl)benzyl)-2-(2-methyl-1H-indol-3-yl)ethan-1-aminium trifluoroacetate (1, Zap-Pano-TFA)

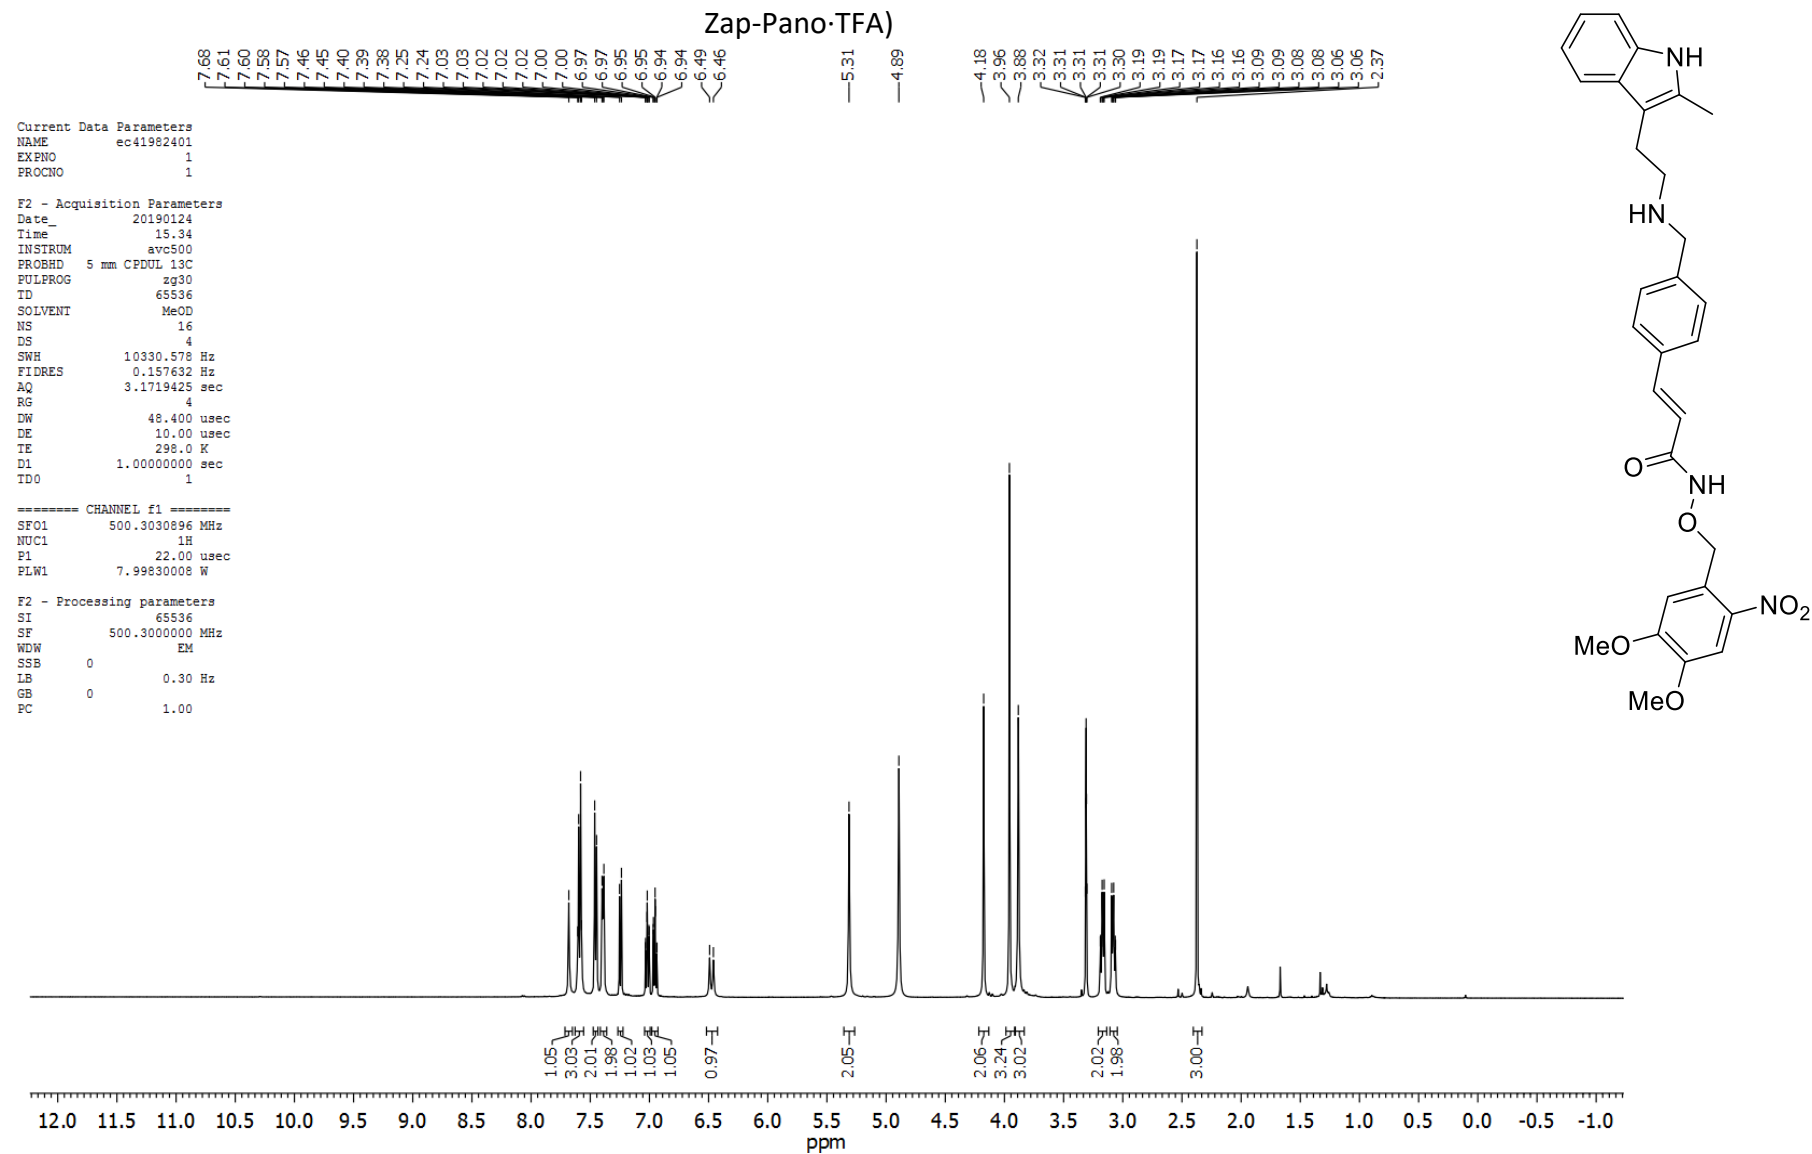

(E)-N-(4-(3-((4,5-Dimethoxy-2-nitrobenzyl)oxy)-3-oxoprop-1-en-1-yl)benzyl)-2-(2-methyl-1H-indol-3-yl)ethan-1-aminium trifluoroacetate (1, Zap-Pano-TFA)

```

Current Data Parameters
NAME      ec41982401
EXPNO     4
PROCNO    1

F2 - Acquisition Parameters
Date_     20190124
Time      16.49
INSTRUM   avc500
PROBHD    5 mm CPDUL 13C
PULPROG   zgpg30
TD         65536
SOLVENT   MeOD
NS         1024
DS         2
SWH        31250.000 Hz
FIDRES     0.476837 Hz
AQ         1.0485760 sec
RG         912
DW         16.000 usec
DE         18.00 usec
TE         298.0 K
D1         2.00000000 sec
D11        0.03000000 sec
TD0        1

===== CHANNEL f1 =====
SFO1      125.8131152 MHz
NUC1       13C
P1         10.00 usec
PLW1       20.18400002 W

===== CHANNEL f2 =====
SFO2      500.3020012 MHz
NUC2       1H
CPDPRG[2] waltz16
PCPD2      80.00 usec
PLW2       7.99830008 W
PLW12      0.60487002 W
PLW13      0.38712001 W

F2 - Processing parameters
SI         32768
SF         125.8005351 MHz
WDW        EM
SSB        0
LB         1.00 Hz
GB         0
PC         1.40
    
```

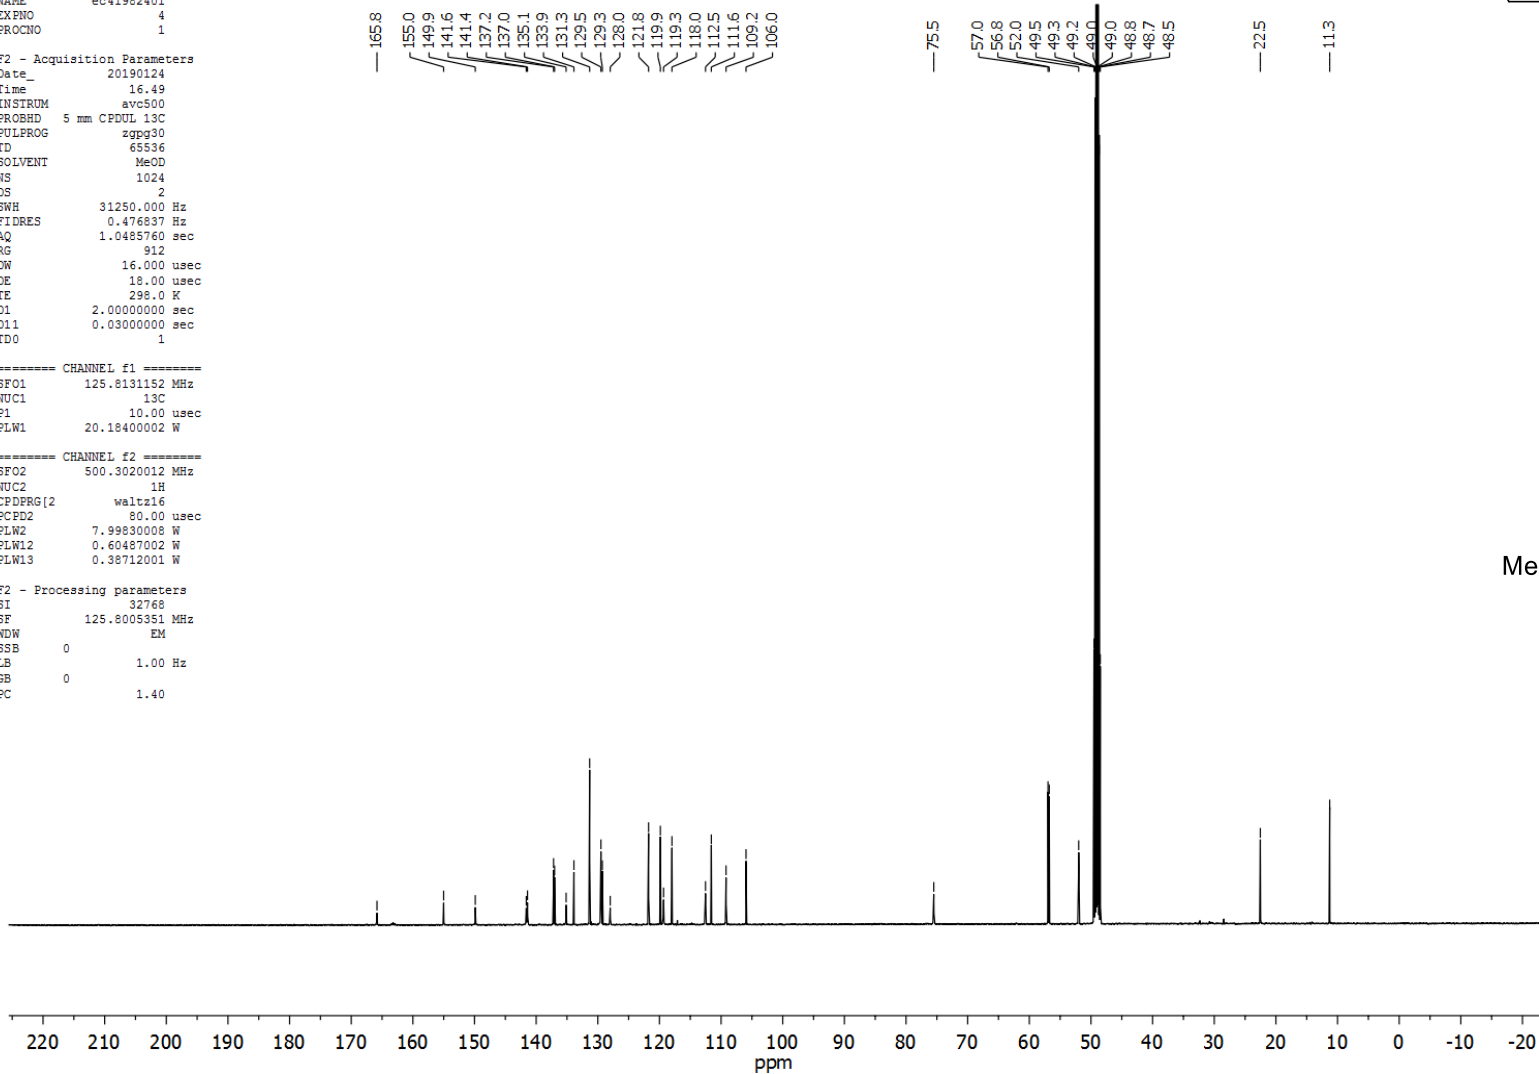

(E)-3-(4-({*tert*-Butyloxycarbonyl-(2-{1-[*tert*-butyloxycarbonyl]-2-methyl-1*H*-indol-3-yl)ethyl)amino)methyl}phenyl)prop-2-enamide (S1)

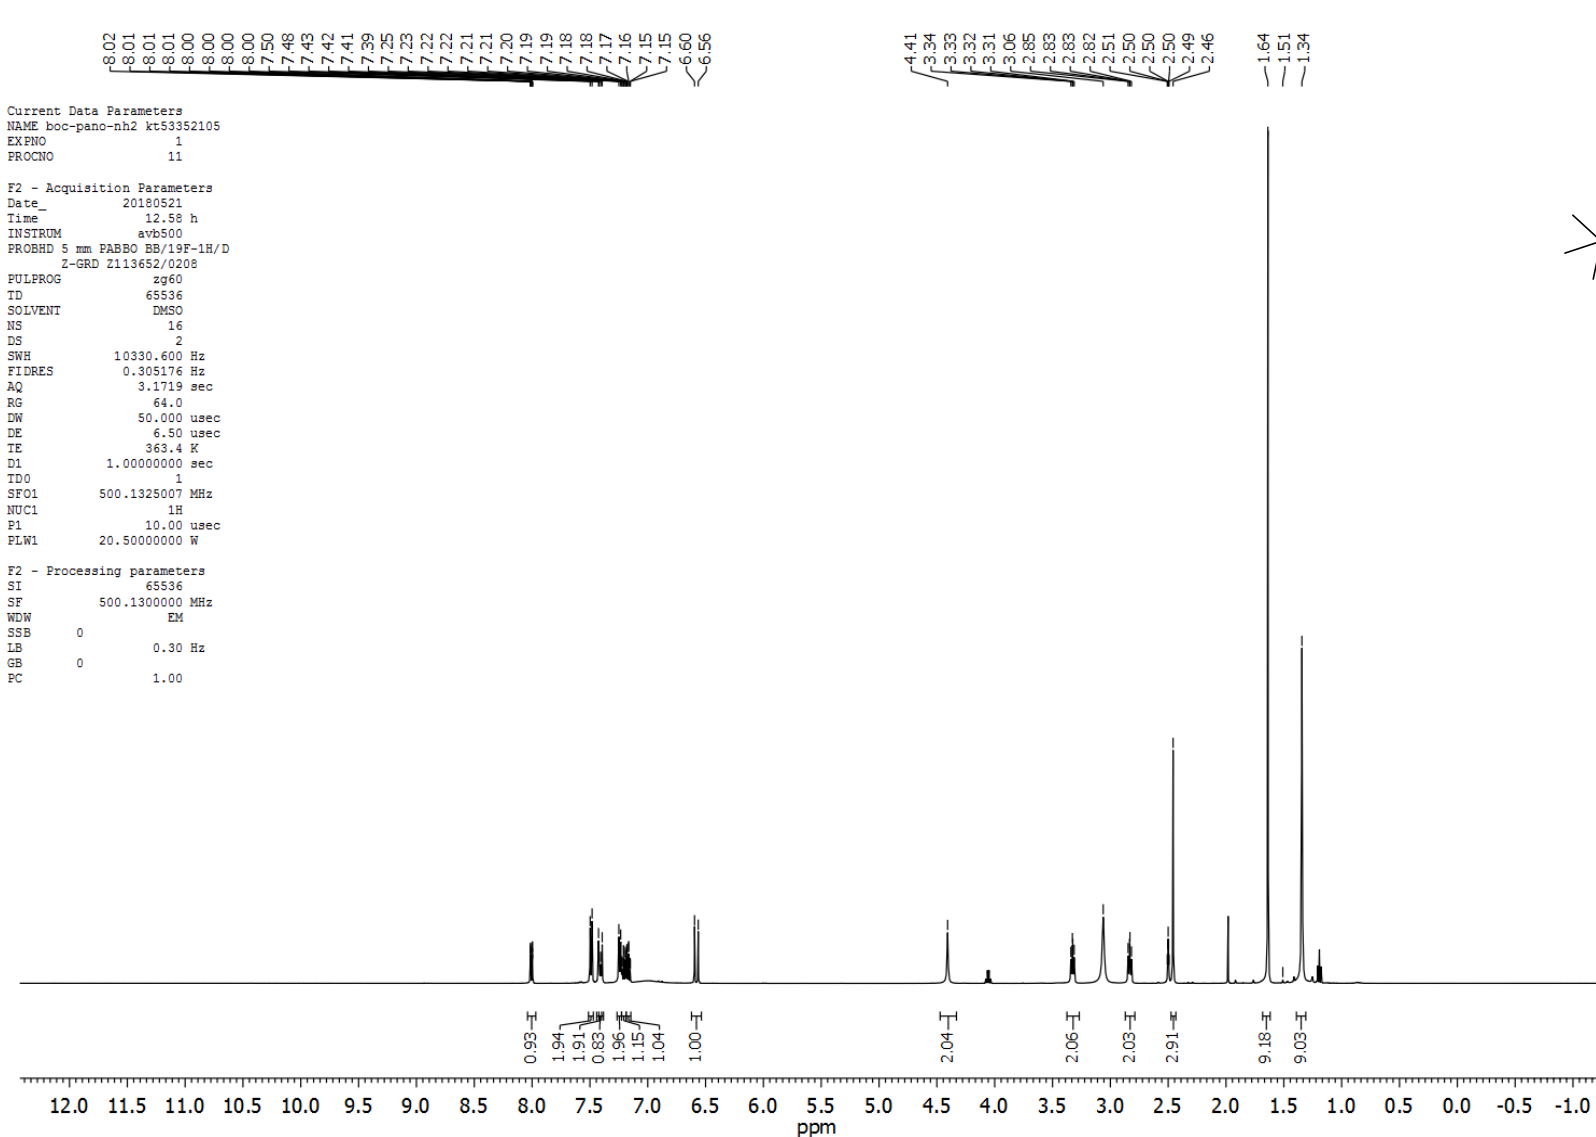

(E)-3-(4-{{tert-Butyloxycarbonyl-(2-{1-[tert-butyloxycarbonyl]-2-methyl-1H-indol-3-yl}ethyl)amino)methyl}phenyl)prop-2-enamide (S1)

```

Current Data Parameters
NAME boc-pano-nh2 kt53352105
EXPNO 12
PROCNO 1

F2 - Acquisition Parameters
Date_ 20190521
Time 13:06 h
INSTRUM avb500
PROBHD 5 mm F4BBO BB/F19-1H/D Z-GRD
Z113652/0208
PULPROG zgpg30
TD 65536
SOLVENT DMSO
NS 256
DS 4
SWH 29761.904 Hz
FIDRES 0.908261 Hz
AQ 1.1010048 sec
RG 2050.0
DW 16.800 usec
DE 6.50 usec
TE 36330 K
D1 2.00000000 sec
D11 0.03000000 sec
TD0 1
SFO1 125.7703643 MHz
NUC1 13C
P1 10.00 usec
PLW1 76.00000000 W
SFO2 500.1320005 MHz
NUC2 1H
CPDPRG2 waltz16
PCPD2 80.00 usec
PLW2 20.50000000 W
PLW12 0.32031000 W
PLW13 0.16111000 W

F2 - Processing parameters
SI 32768
SF 125.7577885 MHz
WDW EM
SSB 0
LB 1.00 Hz
GB 0
PC 1.40
    
```

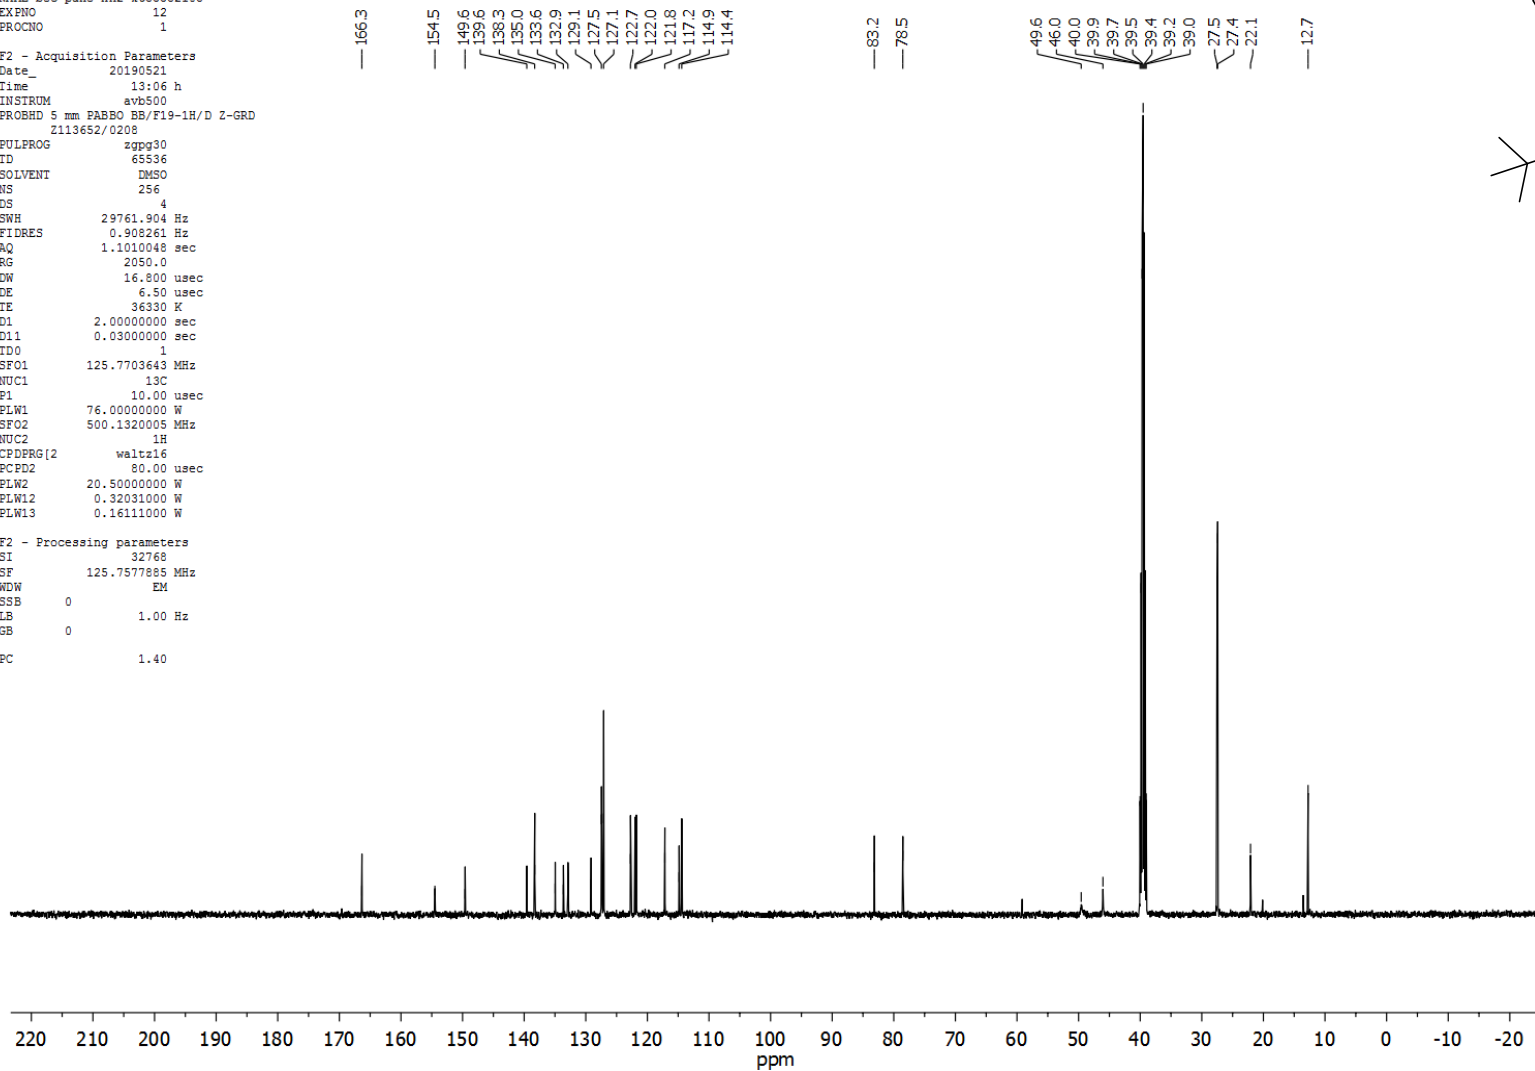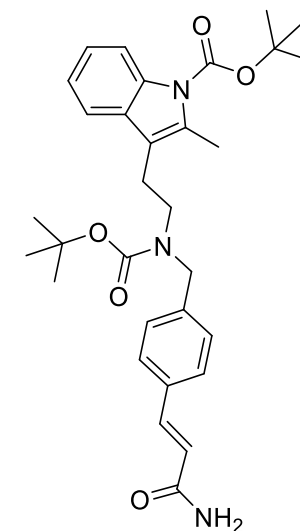



(E)-3-(4-[(2-{2-Methyl-1H-indol-3-yl}ethyl)amino]methyl)phenyl)prop-2-enamide trifluoroacetate (**15**)

Current Data Parameters  
NAME kt55322905  
EXPNO 4  
PROCNO 1

F2 - Acquisition Parameters  
Date\_ 20190601  
Time 15.36  
INSTRUM avc500  
PROBHD 5 mm CPDUL 13C  
PULPROG zgpg30  
TD 65536  
SOLVENT MeOD  
NS 1024  
DS 2  
SWH 31250.000 Hz  
FIDRES 0.476837 Hz  
AQ 1.0485760 sec  
RG 912  
DW 16.000 usec  
DE 18.00 usec  
TE 296.0 K  
D1 2.0000000 sec  
D11 0.0300000 sec  
TD0 1

==== CHANNEL f1 =====  
SFO1 125.8131152 MHz  
NUC1 13C  
P1 10.00 usec  
PLW1 20.18400002 W

==== CHANNEL f2 =====  
SFO2 500.3020012 MHz  
NUC2 1H  
CPDPRG2 waltz16  
PCPD2 80.00 usec  
PLW2 7.99830008 W  
PLW12 0.60487002 W  
PLW13 0.38712001 W

F2 - Processing parameters  
SI 32768  
SF 125.8005351 MHz  
WDW EM  
SSB 0  
LB 1.00 Hz  
GB 0  
PC 1.40

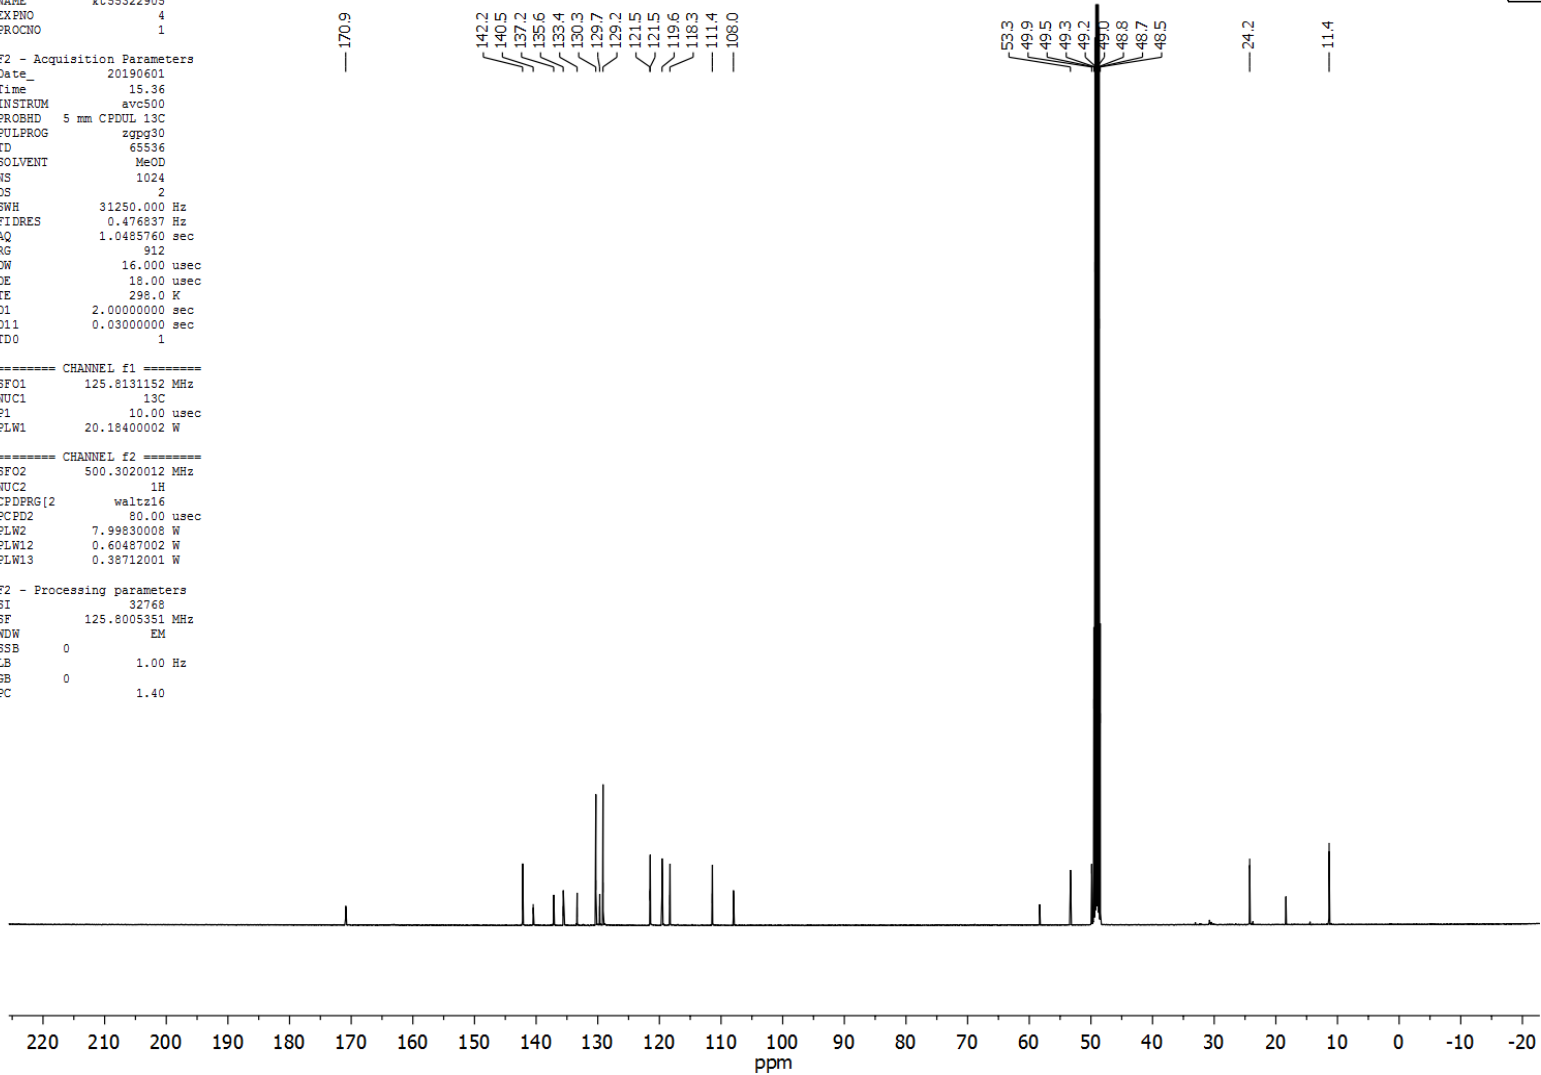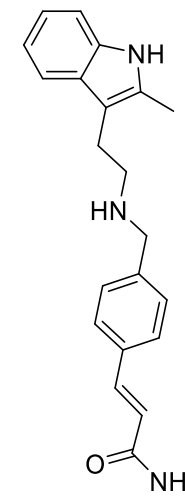

# Panobinostat (2)

EC4-14 Pano

2/26/2018

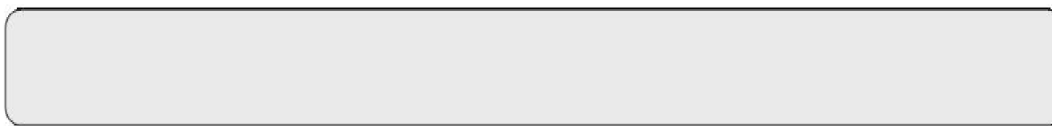

Acquisition Method Purity short run @254 nm  
Acquisition Date/Time 2/26/2018 6:56 pm  
Injection Volume 10  
Sample Name EC4-14 Pano  
Sample Description

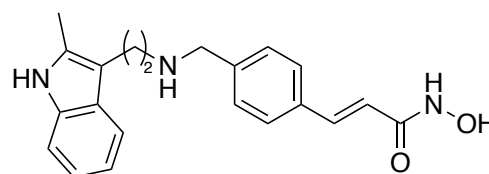

EC4-14 Pano : Injection 1

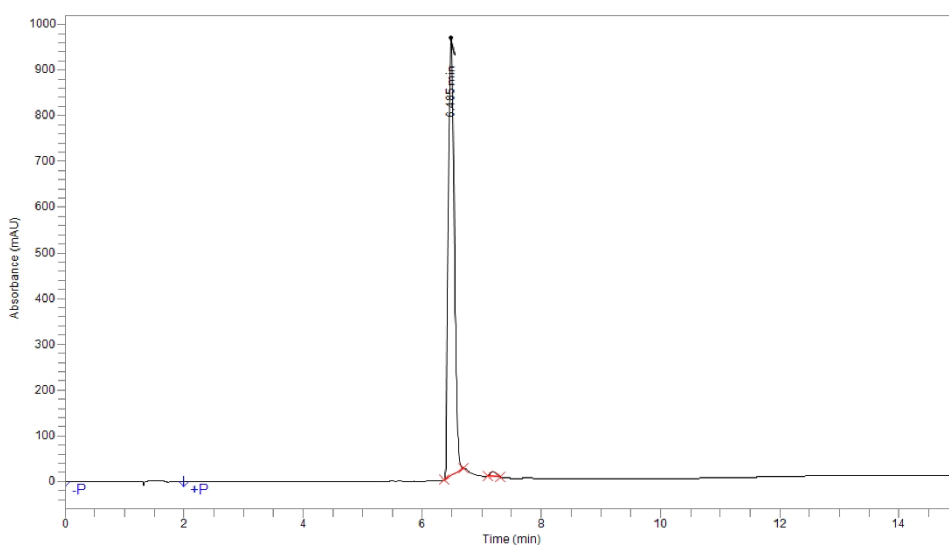

| Time         | Height    | Area        | Area % |
|--------------|-----------|-------------|--------|
| 6.485        | 958,967.0 | 6,619,001.0 | 98.81  |
| 7.183        | 11,494.8  | 79,439.7    | 1.19   |
| <b>Total</b> |           | 6,698,440.7 | 100.00 |

(*E*)-*N*-(4-(3-((Benzyloxy)amino)-3-oxoprop-1-en-1-yl)benzyl)-2-(2-methyl-1*H*-indol-3-yl)ethan-1-aminium 2,2,2-trifluoroacetate (**14**)

EC5-03

11/15/2018

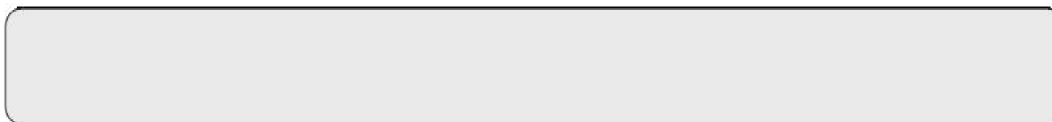

Acquisition Method Purity short run @254 nm  
 Acquisition Date/Time 11/15/2018 10:41 am  
 Injection Volume 10  
 Sample Name EC5-03  
 Sample Description  
 Batch Description

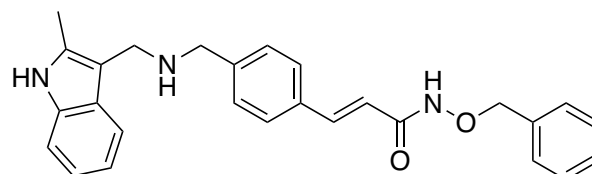

EC5-03 : Injection 1

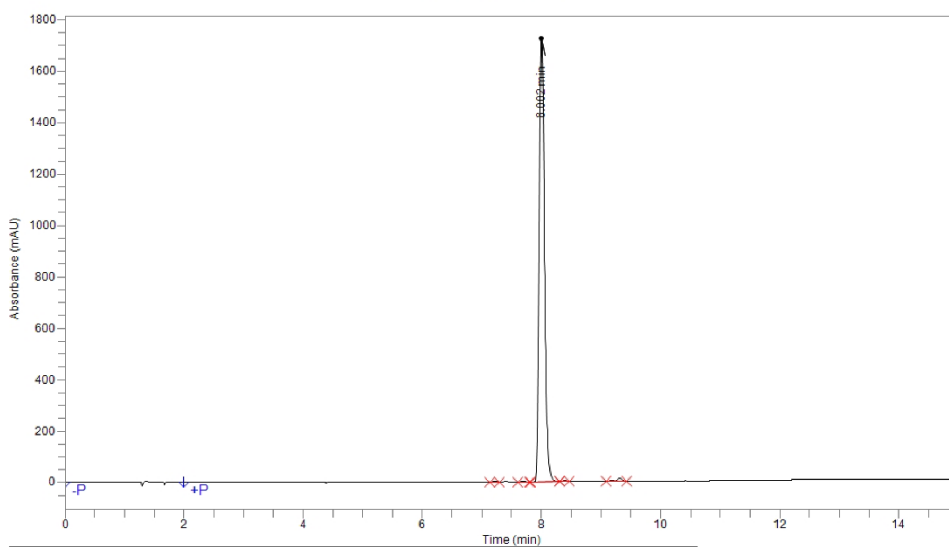

| Time         | Height      | Area         | Area % |
|--------------|-------------|--------------|--------|
| 7.223        | 3,653.0     | 16,559.7     | 0.16   |
| 7.696        | 3,057.3     | 14,995.5     | 0.14   |
| 8.002        | 1,727,141.3 | 10,237,501.0 | 98.80  |
| 8.393        | 4,153.3     | 17,709.5     | 0.17   |
| 9.185        | 3,472.0     | 16,907.9     | 0.16   |
| 9.317        | 11,731.4    | 58,166.0     | 0.56   |
| <b>Total</b> |             | 10,361,839.6 | 100.00 |



# N-Phthalimido-O-(4, 5-dimethoxy-2-nitrobenzyl)-hydroxylamine (7)

EC5-07

2/4/2019

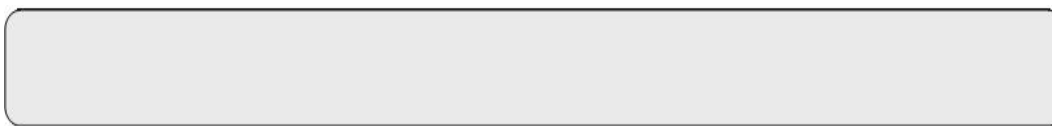

Acquisition Method      Purity short run @254 nm  
 Acquisition Date/Time    2/4/2019 2:56 pm  
 Injection Volume          15  
 Sample Name                EC5-07  
 Sample Description  
 Batch Description         For start up

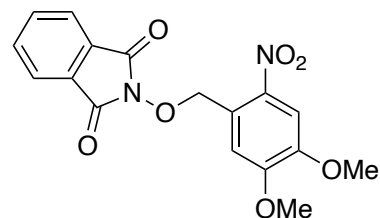

EC5-07 : Injection 1

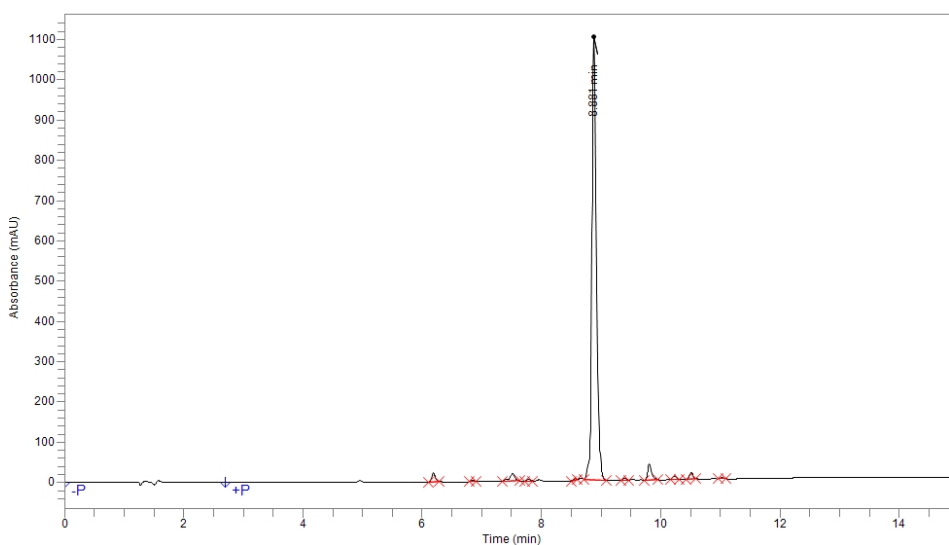

| Time         | Height      | Area        | Area % |
|--------------|-------------|-------------|--------|
| 6.187        | 22,291.7    | 95,260.7    | 1.56   |
| 6.849        | 3,125.7     | 10,874.1    | 0.18   |
| 7.515        | 19,069.4    | 121,228.5   | 1.98   |
| 7.786        | 4,729.3     | 18,356.1    | 0.30   |
| 8.568        | 3,096.0     | 9,847.7     | 0.16   |
| 8.881        | 1,100,867.4 | 5,542,449.0 | 90.73  |
| 9.396        | 5,132.9     | 19,542.5    | 0.32   |
| 9.812        | 40,597.3    | 180,004.5   | 2.95   |
| 10.230       | 7,652.0     | 28,388.1    | 0.46   |
| 10.512       | 16,526.1    | 67,792.6    | 1.11   |
| 11.025       | 3,921.4     | 14,825.9    | 0.24   |
| <b>Total</b> |             | 6,108,569.8 | 100.00 |

# O-(4, 5-Dimethoxy-2-nitrobenzyl)-hydroxylamine (8)

EC5-08

2/4/2019



Acquisition Method Purity short run @254 nm  
 Acquisition Date/Time 2/4/2019 3:31 pm  
 Injection Volume 15  
 Sample Name EC5-08  
 Sample Description  
 Batch Description For start up

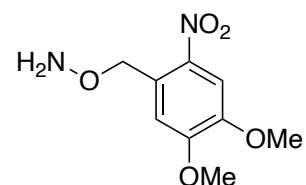

EC5-08 : Injection 1

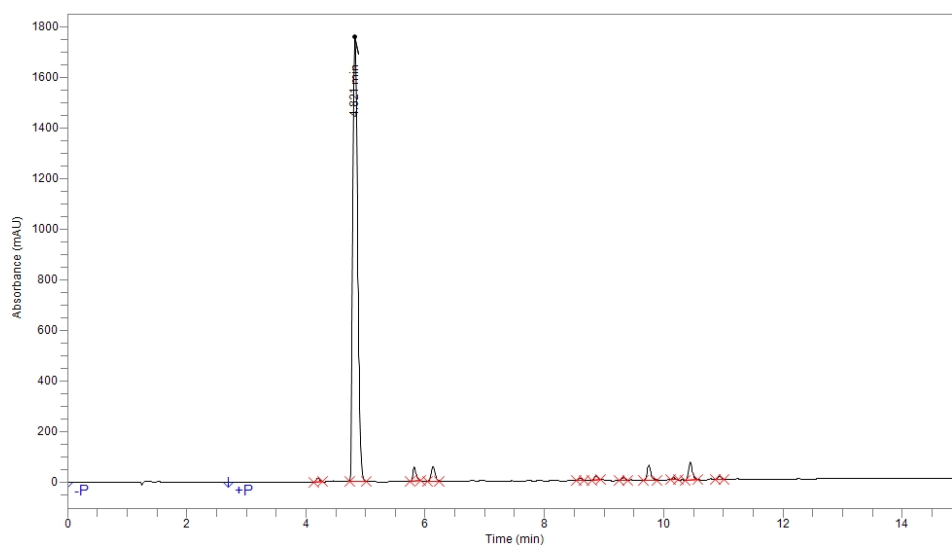

| Time         | Height      | Area         | Area % |
|--------------|-------------|--------------|--------|
| 4.203        | 14,582.9    | 56,795.7     | 0.51   |
| 4.821        | 1,758,260.8 | 9,880,647.6  | 88.18  |
| 5.818        | 55,634.5    | 228,306.6    | 2.04   |
| 6.129        | 57,109.0    | 245,435.0    | 2.19   |
| 8.598        | 9,865.6     | 41,665.7     | 0.37   |
| 8.868        | 17,319.8    | 69,371.1     | 0.62   |
| 9.326        | 10,320.8    | 40,380.4     | 0.36   |
| 9.750        | 59,452.5    | 268,264.5    | 2.39   |
| 10.176       | 7,656.6     | 26,268.1     | 0.23   |
| 10.446       | 69,466.2    | 294,405.6    | 2.63   |
| 10.940       | 13,207.9    | 53,766.9     | 0.48   |
| <b>Total</b> |             | 11,205,307.1 | 100.00 |

*tert*-Butyl-(*E*)-3-(2-((*tert*-butoxycarbonyl)(4-(3-(((4,5-dimethoxy-2-nitrobenzyl)oxy)amino)-3-oxoprop-1-en-1-yl)benzyl)amino)ethyl)-2-methyl-1*H*-indole-1-carboxylate (**10**)

EC2-46

Purity short run @254 nm

2/26/2017 4:01 pm

Sample Name EC2-46  
 Vial Number 1  
 Injection Volume 10  
 Acquisition Date/Time 2/26/2017 3:42 pm  
 Acquisition Method Purity short run @254 nm  
 Processing Method Purity short run @254 nm

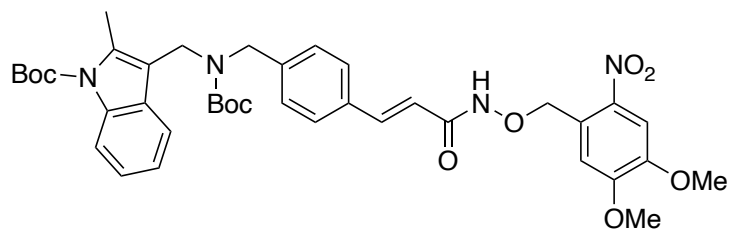

EC2-46 : Injection 1

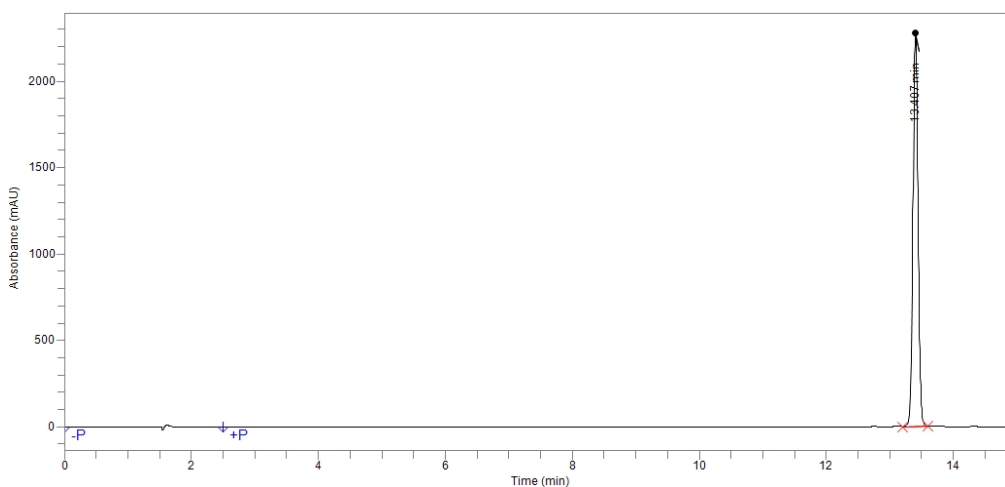

| Time         | Area         | Area % |
|--------------|--------------|--------|
| 13.407       | 13,108,258.3 | 100.00 |
| <b>Total</b> | 13,108,258.3 | 100.00 |

2/26/2017 4:01 pm

Flexar HPLC 2

(E)-N-(4-(3-((4,5-Dimethoxy-2-nitrobenzyl)oxy)-3-oxoprop-1-en-1-yl)benzyl)-2-(2-methyl-1H-indol-3-yl)ethan-1-aminium trifluoroacetate (**1**, Zap-Pano·TFA)

EC5-16

2/4/2019

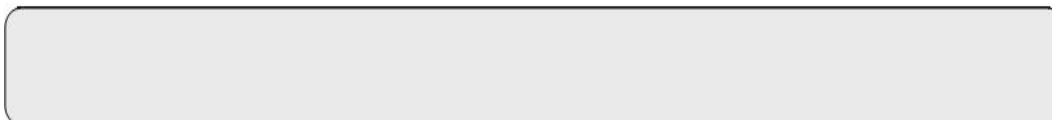

Acquisition Method Purity short run @254 nm  
 Acquisition Date/Time 2/4/2019 4:27 pm  
 Injection Volume 10  
 Sample Name EC5-16  
 Sample Description  
 Batch Description For start up

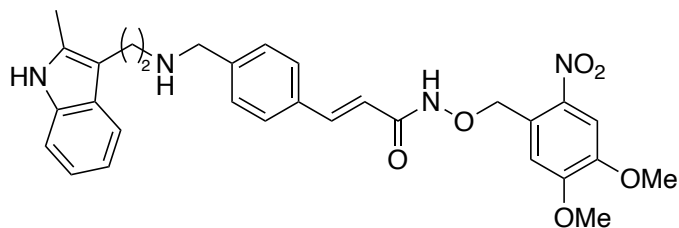

EC5-16 : Injection 1

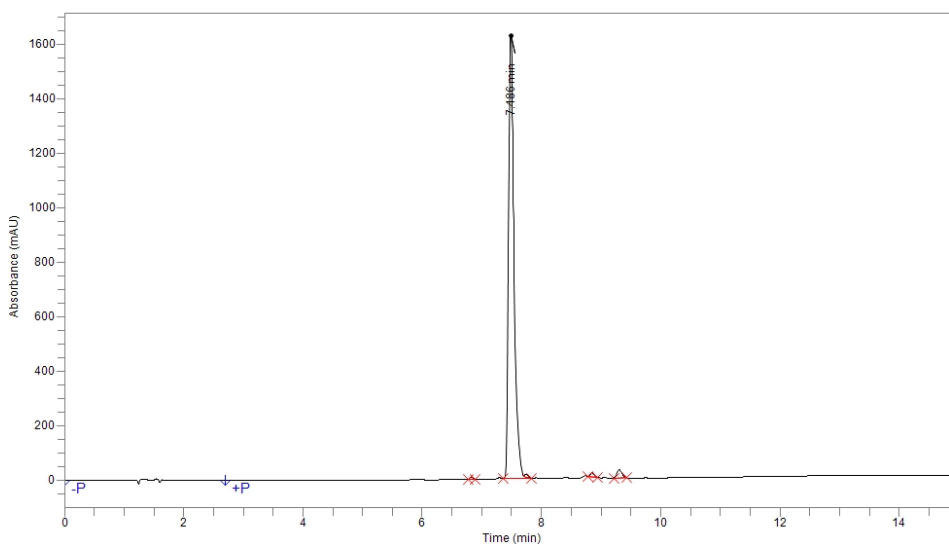

| Time         | Height      | Area         | Area % |
|--------------|-------------|--------------|--------|
| 6.826        | 6,818.0     | 25,051.6     | 0.23   |
| 7.486        | 1,624,206.1 | 10,592,235.0 | 97.20  |
| 7.746        | 12,212.0    | 51,254.2     | 0.47   |
| 8.849        | 15,436.2    | 67,951.5     | 0.62   |
| 9.303        | 29,285.4    | 160,642.4    | 1.47   |
| <b>Total</b> |             | 10,897,134.7 | 100.00 |

(E)-3-(4-(((2-(2-Methyl-1H-indol-3-yl)ethyl)amino)methyl)phenyl)prop-2-enamide (**15**)

EC2-49

Purity short run @254 nm

3/7/2017 10:13 am

Sample Name EC2-49  
Vial Number 1  
Injection Volume 10  
Acquisition Date/Time 3/7/2017 9:56 am  
Acquisition Method Purity short run @254 nm  
Processing Method Purity short run @254 nm

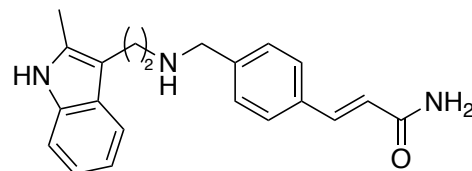

EC2-49 : Injection 1

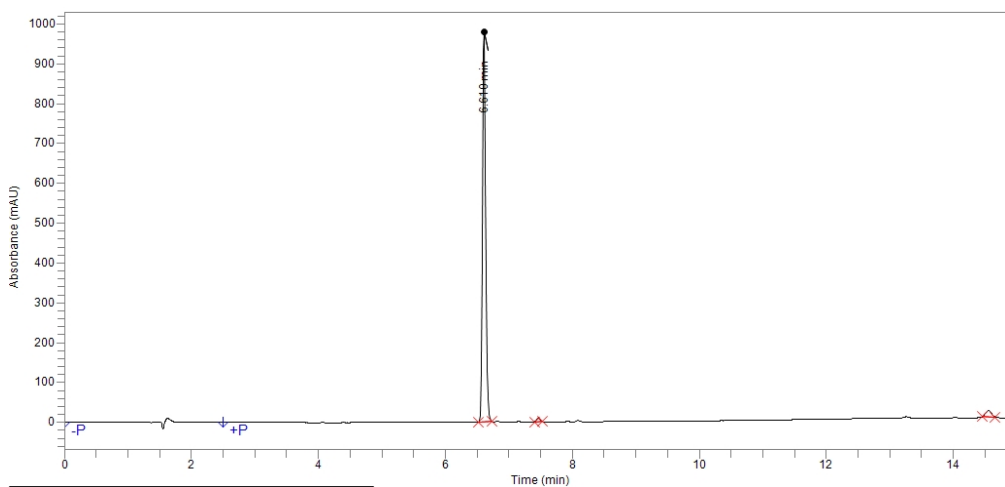

| Time         | Area               | Area %        |
|--------------|--------------------|---------------|
| 6.610        | 3,324,959.2        | 96.21         |
| 7.462        | 33,716.5           | 0.98          |
| 14.555       | 97,152.7           | 2.81          |
| <b>Total</b> | <b>3,455,828.4</b> | <b>100.00</b> |

3/7/2017 10:13 am

Flexar HPLC 2

# LCMS comparison of Pano-NH<sub>2</sub> (15) and Pano acid

## Preparative LC - With MS Spectra

PANO acid\_PANO amide SPIKE

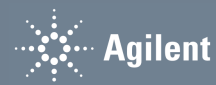

**Data file:** C:\Users\Public\Documents\ChemStation\1\Data\PANO acid\_DSCH05051 2021-07-02 06-47-46\003-P1-E11-PANO acid\_PANO amide SPIKE.D

**Sample name:** PANO acid\_PANO amide SPIKE

**Description:**

|                                                                            |                                                                        |
|----------------------------------------------------------------------------|------------------------------------------------------------------------|
| <b>Injection:</b> 1 of 1                                                   | <b>Location:</b> P1-E11                                                |
| <b>Injection volume:</b> 10.000                                            | <b>Sample amount:</b> 0.000                                            |
| <b>Instrument:</b> LCMS                                                    | <b>Injection date:</b> 2021-07-02 07:20:50+00:00                       |
| <b>Acq. operator:</b> SYSTEM                                               | <b>Acq. method:</b> ZAP-PANO_MECN_20_80_H2O_FA_100_1000_POS_NEG.FULL.M |
| <b>Analysis method:</b> ZAP-PANO_MECN_20_80_H2O_FA_100_1000_POS_NEG.FULL.M | <b>Last changed:</b> 2021-07-02 07:11:00+00:00                         |

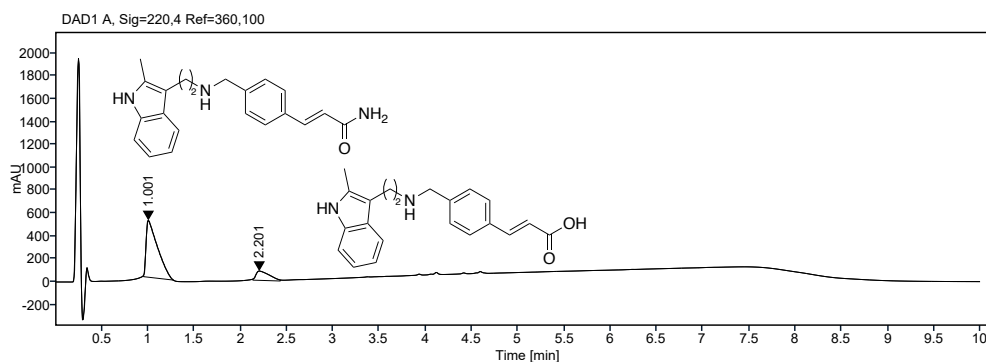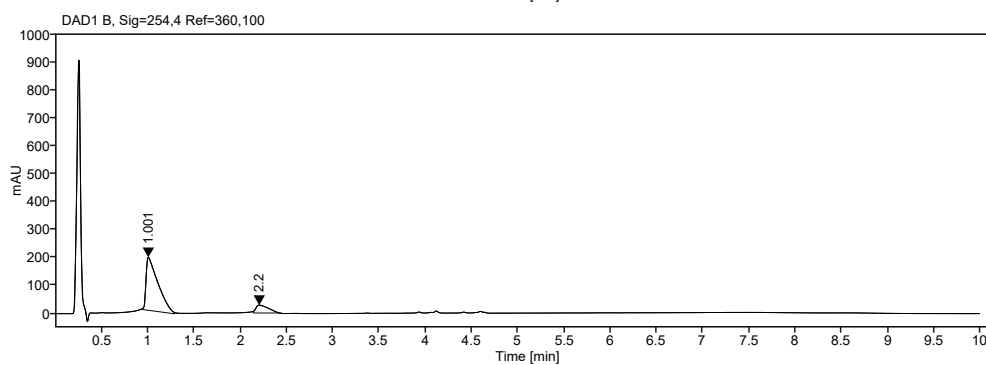

# Preparative LC - With MS Spectra

PANO acid\_PANO amide SPIKE

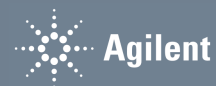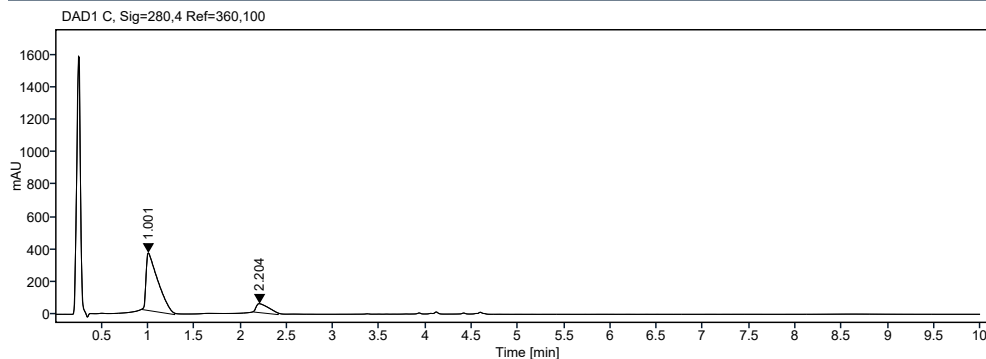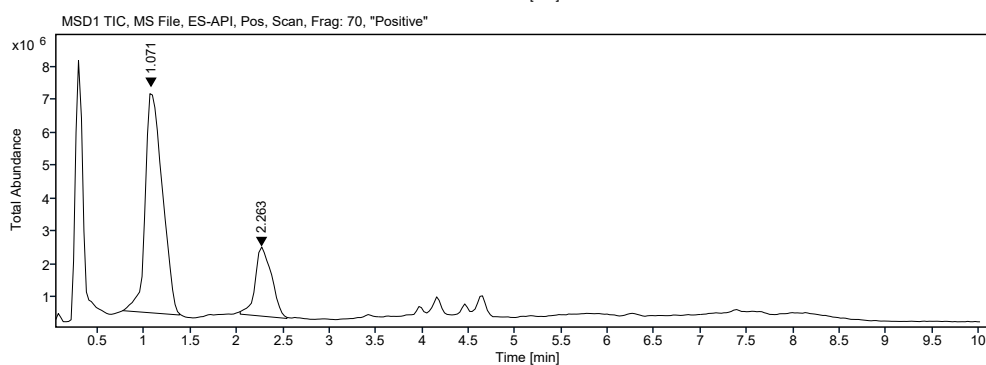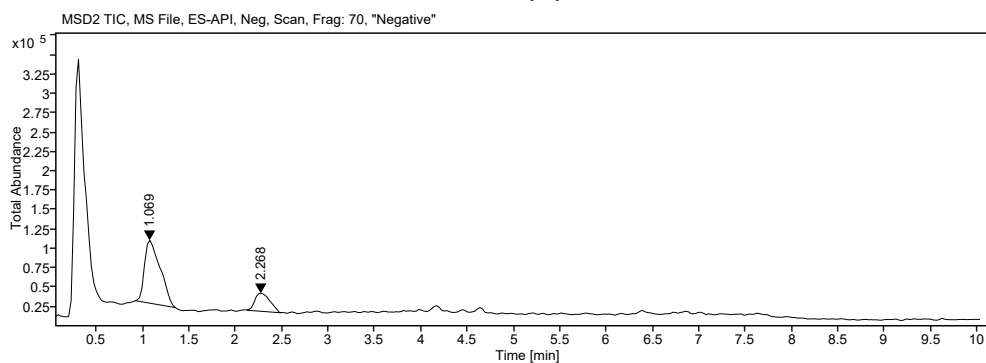

# Preparative LC - With MS Spectra

PANO acid\_PANO amide SPIKE



Signal details: MSD1 TIC, MS File, ES-API, Pos, Scan, Frag: 70, "Positive"

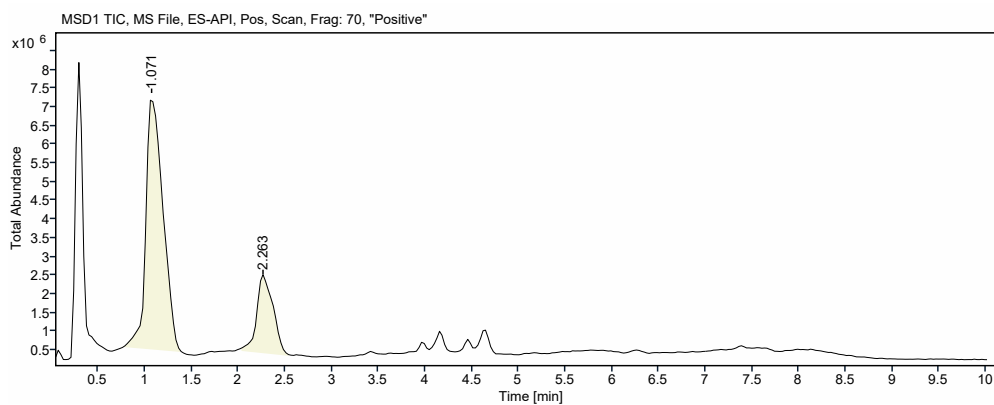

| RT [min] | Signal Description                                         | Symmetry | Resolution | Height [count] | Area [count*min] | Rel. Area [%] |
|----------|------------------------------------------------------------|----------|------------|----------------|------------------|---------------|
| 1.071    | MSD1 TIC, MS File, ES-API, Pos, Scan, Frag: 70, "Positive" | 0.51739  |            | 6858366        | 86063536         | 77.0          |
| 2.263    | MSD1 TIC, MS File, ES-API, Pos, Scan, Frag: 70, "Positive" | 0.62214  | 3.72645    | 2113574        | 25744076         | 23.0          |

Filtered on peak height > 100000 counts



## Preparative LC - With MS Spectra

PANO acid\_PANO amide SPIKE

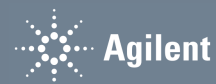

Retention time: 1.071 min Area Percent: 77%

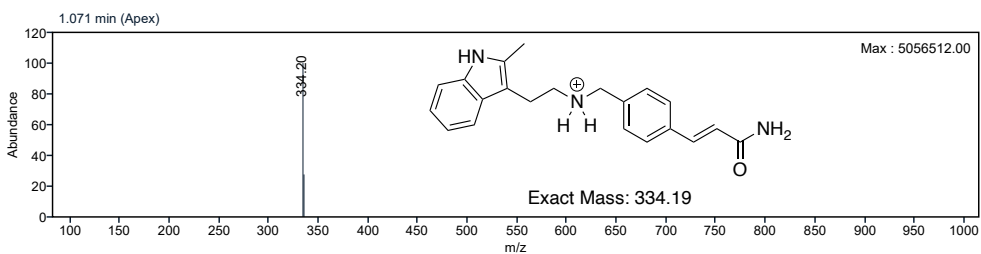

Retention time: 2.263 min Area Percent: 23%

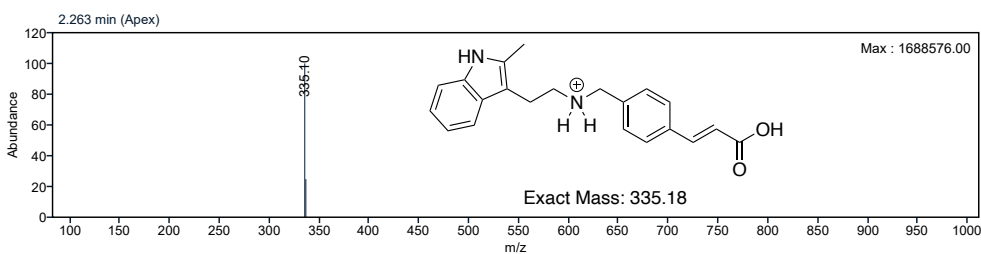

Acquisition Method: ZAP-PANO\_MECN\_20\_80\_H2O\_FA\_100\_1000\_POS\_NEG.FULL.M  
Path: C:\Users\Public\Documents\ChemStation\1\Data\PANO acid\_DSCH05051 2021-07-02 06-47-46  
Acquisition Method: ZAP-PANO\_MECN\_20\_80\_H2O\_FA\_100\_1000\_POS\_NEG.FULL.M  
Path: C:\Users\Public\Documents\ChemStation\1\Data\PANO acid\_DSCH05051 2021-07-02 06-47-46  
Data Analysis Method: ZAP-PANO\_MECN\_20\_80\_H2O\_FA\_100\_1000\_POS\_NEG.FULL.M  
Path: C:\Users\Public\Documents\ChemStation\1\Data\PANO acid\_DSCH05051 2021-07-02 06-47-46

### Method Information

Method: C:\Users\Public\Documents\ChemStation\1\Data\PANO acid\_DSCH05051 2021-07-02 06-47-46\ZAP-PANO\_MECN\_20\_80\_H2O\_FA\_100\_1000\_POS\_NEG.FULL.M  
Modified: 1/1/1970 at 12:00:00 AM  
Description: 80%H2O/20%MeCN +0.1% FA to 30%H2O/70%MeCN + 0.1% FA over 6 minutes, 40 °C
